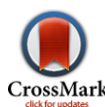

# Usnic Acid Potassium Salt: An Alternative for the Control of *Biomphalaria glabrata* (Say, 1818)

Mônica C. B. Martins<sup>1\*</sup>, Monique C. Silva<sup>1</sup>, Luanna R. S. Silva<sup>2</sup>, Vera L. M. Lima<sup>1</sup>, Eugênia C. Pereira<sup>3\*</sup>, Emerson P. S. Falcão<sup>4</sup>, Ana M. M. A. Melo<sup>2</sup>, Nicácio Henrique da Silva<sup>1</sup>

**1** Departamento de Bioquímica, Universidade Federal de Pernambuco, Pernambuco, Brazil, **2** Departamento de Radiobiologia, Universidade Federal de Pernambuco, Pernambuco, Brazil, **3** Departamento de Ciências Geográficas, Universidade de Pernambuco, Pernambuco, Brazil, **4** Centro Acadêmico de Vitória de Santo Antão, Universidade Federal de Pernambuco, Pernambuco, Brazil

## Abstract

In Brazil, the snail *Biomphalaria glabrata* is the most important vector of schistosomiasis due to its wide geographical distribution, high infection rate and efficient disease transmission. Among the methods of schistosomiasis control, the World Health Organization recommends the use of synthetic molluscicides, such as niclosamide. However, different substances of natural origin have been tested as alternatives for the control or eradication of mollusks. The literature describes the antitumor, antimicrobial and antiviral properties of usnic acid as well as other important activities of common interest between medicine and the environment. However, usnic acid has a low degree of water solubility, which can be a limiting factor for its use, especially in aquatic environments, since the organic solvents commonly used to solubilize this substance can have toxic effects on aquatic biota. Thus, the aim of the present study was to test the potassium salt of usnic acid (potassium usnate) with regard to molluscicidal activity and toxicity to brine shrimp (*Artemia salina*). To obtain potassium usnate, usnic acid was extracted with diethyl ether isolated and purified from the lichen *Cladonia substellata*. Biological assays were performed with embryos and adult snails of *B. glabrata* exposed for 24 h to the usnate solution solubilized in dechlorinated water at 2.5; 5 and 10 µg/ml for embryos, 0.5; 0.9; 1;5 and 10 µg/ml for mollusks and 0.5; 1; 5; 10 µg/ml for *A. salina*. The lowest lethal concentration for the embryos and adult snails was 10 and 1 µg/ml, respectively. No toxicity to *A. salina* was found. The results show that modified usnic acid has increased solubility (100%) without losing its biological activity and may be a viable alternative for the control of *B. glabrata*.

**Citation:** Martins MCB, Silva MC, Silva LRS, Lima VLM, Pereira EC, et al. (2014) Usnic Acid Potassium Salt: An Alternative for the Control of *Biomphalaria glabrata* (Say, 1818). PLoS ONE 9(11): e111102. doi:10.1371/journal.pone.0111102

**Editor:** Peter P. Fong, Gettysburg College, United States of America

**Received:** May 29, 2014; **Accepted:** September 22, 2014; **Published:** November 6, 2014

**Copyright:** © 2014 Martins et al. This is an open-access article distributed under the terms of the Creative Commons Attribution License, which permits unrestricted use, distribution, and reproduction in any medium, provided the original author and source are credited.

**Data Availability:** The authors confirm that all data underlying the findings are fully available without restriction. All relevant data are within the paper.

**Funding:** MCBM received a doctoral grant by Coordenação de Aperfeiçoamento de Pessoal de Nível Superior (CAPES) ([www.capes.gov.br](http://www.capes.gov.br)). ECP has a grant in research productivity by Conselho Nacional de Desenvolvimento Científico e Tecnológico (CNPq) ([www.cnpq.br](http://www.cnpq.br)). The funders had no role in study design, data collection and analysis, decision to publish or preparation of the manuscript.

**Competing Interests:** The authors have declared that no competing interests exist.

\* Email: monicabarmartins@hotmail.com (MCBM); verticillaris@gmail.com (ECP)

† These authors contributed equally to this work.

## Introduction

Schistosomiasis is a parasitic disease distributed in 74 countries on the African, Asian and American continents. In Latin America, this disease is found in Venezuela, the Caribbean islands and Brazil. In the latter country, public health agencies reported 0.28 deaths per 100 million inhabitants in 2009, which corresponds to 1.1% of deaths related to infectious diseases [1]. While these data from 2009 seem to indicate a reduction in the transmission of this disease in Brazil, there were 820 cases of the most severe forms between 2000 and 2010, with approximately 505 deaths in the period [2]. It is therefore clear that access of infected individuals to diagnosis and treatment remains limited [3].

Disease transmission is complex due to the many factors involved, e.g., the presence definitive host in the environment, low socio economic status of the population, deficient or absent environmental or household basic sanitation systems, low level of health education among the population at risk and the presence of intermediate hosts (snails) infected with *Schistosoma mansoni* [1].

According to the World Health Organization, control methods for this parasitic disease should involve chemotherapy, health education, basic sanitary services, the interruption of the lifecycle of the parasite and the elimination or reduction in the mollusk intermediate host population in endemic areas using molluscicidal agents [4,5].

It is estimated that more than 7000 chemicals have been tested for mollusk control, such as copper sulfate, gramoxone, calcium hydroxide, N-tritylmorpholin (Frescon) and niclosamide [6,7]. Niclosamide is highly efficient in all stages of the mollusk lifecycle, killing 100% of adults and embryos at a concentration of less than 1.5 µg/ml after 2 h of exposure [8]. However, its high cost, sensitivity to sunlight and high degree of toxicity to fish, amphibians and aquatic plants [9] has limited its use, especially in developing countries, which often have serious basic sanitation problems [10]. The use of niclosamide in *B. glabrata* eradications programs is common in Brazil. However, the re-colonization of mollusks is observed after months of application, possibly due to resistance mechanisms developed by these organisms. This makes

biological control programs expensive and operationally difficult, especially in poor municipalities [11]. Thus, there is a need for studies aimed at developing specific, low cost alternatives to combating snails. Accordingly, the search for molluscicides derived from plants or natural extracts has gained prominence worldwide, the aim of which is to obtain cheaper, biodegradable, safe, efficient products for controlling snail populations [12].

A lichen is the association of a heterotrophic organism (mycobiont) and an autotrophic organism (photobiont). Lichens produce a variety of substances with phenolic traits, known as lichen substances, which are considered natural protectors of the thallus. The antibacterial [13], antifungal [14], antiviral [15], antitumor [16], insecticidal [17] and sunscreen [18] properties of these substances are known. Phenols derived from lichen substances (some unique to the class) comprise four distinct, well characterized, core chemical structures: depsides, depsidones, depsones and dibenzofurans (usnic acid) [19]. Usnic acid (Figure 1) is widely distributed among the genera *Cladonia* and *Usnea*, accounting for as much as 6% of the dry weight of the lichen thallus [20]. However, usnic acid has a low degree of water solubility, which can be a limiting factor for its use, especially in aquatic environments, since the organic solvents commonly used to solubilize this substance can have toxic effects on aquatic biota. Potassium and sodium salts derived from usnic acid are completely soluble in water and can be obtained from the purified molecule extracted from different lichens, such as *Cladonia substellata*, or chemically synthesized in the laboratory [21]. The literature describes the antibacterial and fungal properties of these salts [22].

Although usnic acid has been investigated for its potential in different fields of research, including its insecticidal or antiherbivory action on snails, the molluscicidal action of its potassium salt against vectors of parasitic diseases has not yet been described. Thus, the aim of the present study was to investigate the effect of potassium usnate chemically derived from usnic acid purified from *Cladonia substellata* (Vainio) on adults and embryos (blastocyst stage) of *B. glabrata* as well as its toxicity to brine shrimp (*Artemia salina* Leach). The simple bench top bioassay involving the brine shrimp lethality test was used as an environmental bioindicator to probe the pharmacological activity of potassium usnate.

## Material and Methods

### Lichen

Samples of *Cladonia substellata* (Vainio) (300 g) were collected in Mamanguape, Paraíba (northeastern Brazil), at the margins of a Federal Highway BR-101, Coordinates 6° 8' 19" S/35° 8' 11" W,

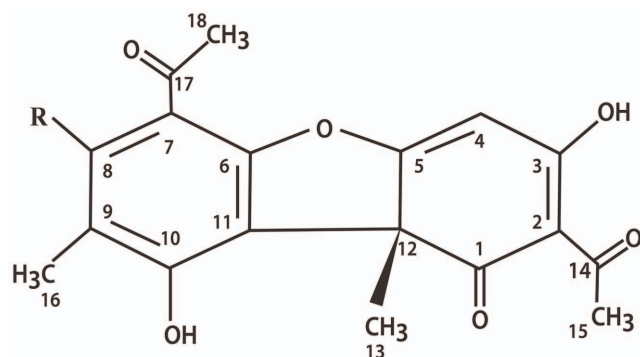

**Figure 1. Chemical structure of usnic acid.** R= OH usnic acid; R= OK potassium usnate.  
doi:10.1371/journal.pone.0111102.g001

in August 2012. This way, permission for lichen collection was not required, as well as field studies did not involve endangered or protected species. Thallus identification was performed by MSc Maria de Lourdes Buriel and a voucher specimen was deposited at the UFP Herbarium, Dept. of Botany of the Federal University of Pernambuco, Brazil (voucher n° 34402).

### Ether extract to obtain purified usnic acid

The thallus of *C. substellata in natura* (200 g) was macerated and submitted to four successive extractions with diethyl ether in a Soxhlet apparatus at 40°C for 16 h, as described elsewhere [23].

### Isolation and purification of usnic acid and acquisition of potassium usnate

For the separation, isolation and purification of usnic acid, the ether extract was fractionated in a column of silica gel (70–230 mesh) eluted in the chloroform:hexane (80:20 v/v) solvent system [24]. After the purification process, 500 mg of the acid were partially dissolved in 40 ml of water at 40°C and subsequently sprayed with previously prepared KOH 10% until complete solubilization of the compound. The solution was frozen at –80°C and then lyophilized.

### Identification of usnic acid and potassium usnate

Usnic acid purity (>95%) was determined using high performance liquid chromatography (HPLC). The HPLC assays involved the use of a Hitachi chromatograph coupled to a UV detector at 254 nm and a reverse phase column (RP 18). The samples (usnic acids purified and usnic standard Merck) were injected at a concentration of 0.1 mg/ml. The mobile phase was methanol/water/acetic acid (80:19.5:0.5 v/v/v). The flow was 1.0 ml min<sup>-1</sup>. The substances were identified based on their retention times and comparisons with standard usnic acid [25]. The confirmation of the molecular structure was performed by analyzing the spectra of proton nuclear magnetic resonance (<sup>1</sup>H NMR) obtained at 300 MHz in CDCl<sub>3</sub> (Varian UNITY spectrometer) and infrared spectroscopy. Potassium usnate was analyzed by infrared spectroscopy (Bruker- IF566).

### *Biomphalaria glabrata* (Say, 1818)

A pigmented wild type strain of *B. glabrata* obtained from São Lourenço da Mata (state of Pernambuco, Brazil) reared in the Laboratory of Radiobiology at the Biophysics and Radiobiology Department at the Federal University of Pernambuco, was used. Adult animals, *S. mansoni* negative, were maintained in plastic aquaria with filtered, dechlorinated water (changed once a week), pH 7.0, at room temperature 25±2°C and fed with fresh lettuce (*Lactuca sativa*).

### Toxicity of potassium usnate to *B. glabrata* embryos

Embryotoxicity assay were conducted with five intact egg masses containing 100 embryos (n=100) in the blastula stage (15 h after spawning) were selected in a stereomicroscope (Leica MZ6; Leica Microsystems, Wetzlar, Germany) and placed in Petri dishes (10 mm). The potassium usnate (2.5; 5 and 10 µg/ml) or filtered water as control were added to the Petri dishes (10 ml) and, after incubation (24 h). The egg masses were washed under filtered water and maintained in Petri dishes containing filtered and dechlorinated water at 25±2°C in BOD (Eletrolab). Embryos were observed for 8 days from the beginning of the development until nearly hatching. The mortality and hatched were determined by observation under a stereomicroscope (Leica MZ6; Leica

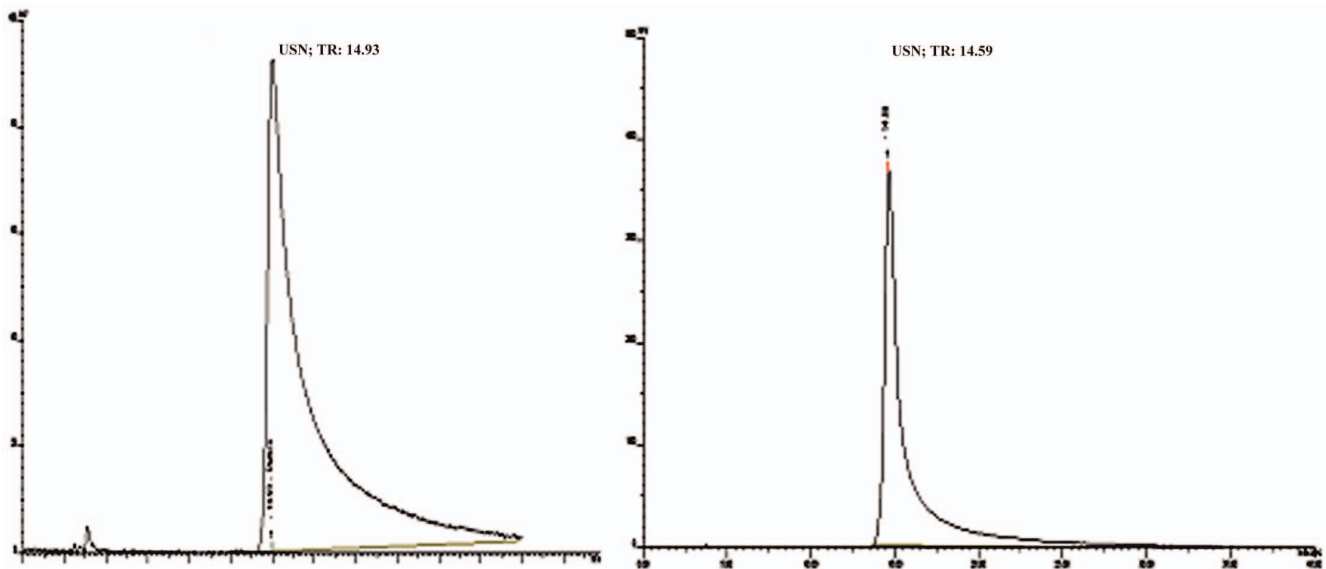

**Figure 2. High performance liquid chromatograms.** A- Merk usnic acid standard (RT-14.93), B- usnic acid purified from *Cladonia substellata* (RT-14.59).

doi:10.1371/journal.pone.0111102.g002

Microsystems, Wetzlar, Germany). The experiments were performed in triplicate for each potassium usnate concentrations.

#### Toxicity of potassium usnate to adults of *Biomphalaria glabrata*

Bioassays were performed following the method described by the WHO Expert Committee on the Bilharzia [26]. A population of 200 snails was pre-selected and kept in reproductive isolation for five days to confirm sexual maturity. For the experiments, healthy adult snails ( $n = 5$ ) of uniform size (shell diameter =  $10 \pm 1$  mm) were exposed for 24 h to potassium usnate solubilized in filtered water at concentrations of 0.25; 0.5; 0.9; 1; 2.5; 5; 10; 50 and 100  $\mu\text{g}/\text{ml}$  with a final volume of 500 ml of solution. The assay was performed in 500 ml glass beakers, and copper (II) carbonate (50  $\mu\text{g}/\text{ml}$ ) and filtered tap water were used as positive and negative controls, respectively. The snails were considered dead when they showed inactivity, the body and shell were discoloured and absence of heart beats. The bioassays were conducted in triplicate for each of the potassium usnate concentrations.

#### Environmental toxicity

Toxicity assay using brine shrimp (encysted eggs of *A. salina* - 25 mg) were hatched in a beaker filled with natural seawater (pH 8), artificial light at  $30^\circ\text{C}$ , under constant aeration. After 48 h, the newly hatched larvae were collected and the lethality assay according to procedures described by elsewhere [5]. Groups of 10 ( $n = 10$ ) larvae were exposed the potassium usnate (0.5; 1; 5; 10  $\mu\text{g}/\text{ml}$ ) diluted in natural seawater (5 ml) and, after 24 h, the survival rates (%) were recorded. In the control group, larvae were incubated in seawater. The experiments were conducted in quadruplicate for each of the potassium usnate concentrations.

#### Statistical analysis

The statistical analysis and standard deviations (SD) were performed using GraphPad Prism 5.0 for Windows (GraphPad Software San Diego, CA, USA) and the data were expressed as replicate means  $\pm$  SD. Significant differences were established using one-way analysis of variance (ANOVA) and Tukey's test, and  $p < 0.05$  was considered significant for both analysis. The lethal concentrations required for 50% killing ( $\text{LC}_{50}$ ) of *A. salina* larvae, embryos or *B. glabrata* snails were calculated using probit

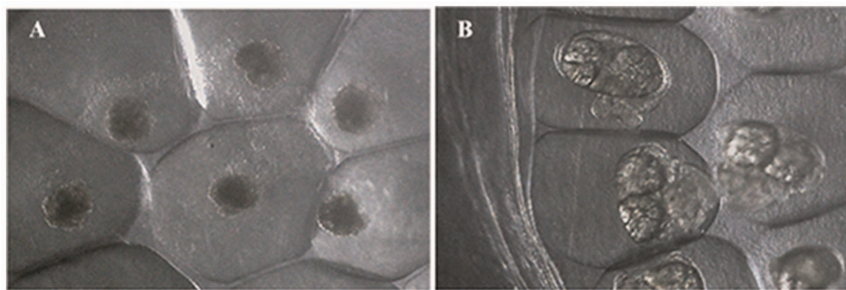

**Figure 3. Survival and mortality of *B. glabrata* embryos.** A- eggs masses treated at 10  $\mu\text{g}/\text{ml}$  of potassium usnate showing 100% mortality, B - eggs masses not treated with 100% survival in control group 1 (dechlorinated water).

doi:10.1371/journal.pone.0111102.g003

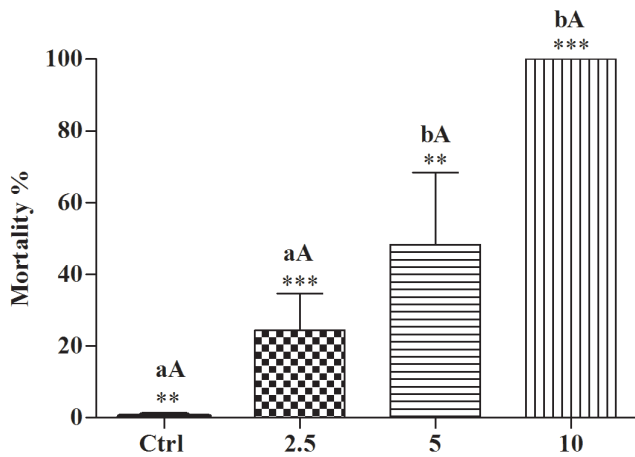

**Figure 4. Toxicity of potassium usnate to *B. glabrata* embryos.** Mortality of blastula stage embryos subjected to 24 h of treatment with potassium usnate at 2.5; 5 and 10 µg/ml and control group (Ctrl 1 – dechlorinated water). Letter A to indicate bars are the same (ANOVA \*\*\* $p < 0.0001$ ); and letter B to indicate that the bars are significantly different from each other (Tukey's test \*\* $p < 0.05$ ). doi:10.1371/journal.pone.0111102.g004

analysis with a reliability interval of 95% using the StatPlus1 168 2006 software (Analyst Soft, Canada).

## Results

### Chemical analysis

Purified usnic acid was obtained from the ether extract. The data on the purified substance was analyzed by HPLC (Figure 2), which revealed a retention time (RT) of 14.59 min and 99% purity. The molecular structure confirmed by  $^1\text{H}$  NMR and infrared spectroscopy may be compared with data reported by Huneck and Yoshimura [27], with the following description:  $^1\text{H}$  NMR and IR analysis of purified usnic acid: this substance is a yellow crystalline solid, MP, 201–203°C,  $[\alpha]_D$  at 25°C + 493° (CHCl<sub>3</sub> c, 1.00),  $^1\text{H}$  NMR (300 MHz, DMSO- $d_6$ )  $\delta$ H (H; *mult.*; int.): 1.73 (3H; s, CH<sub>3</sub>-13), 2.08 (3H; s, CH<sub>3</sub>-16), 2.64 (3H; s, CH<sub>3</sub>-15), 2.65 (3H; s, CH<sub>3</sub>-18), 5.92 (1H; s, C-4-H), 11.04 (1H; s, C-10-

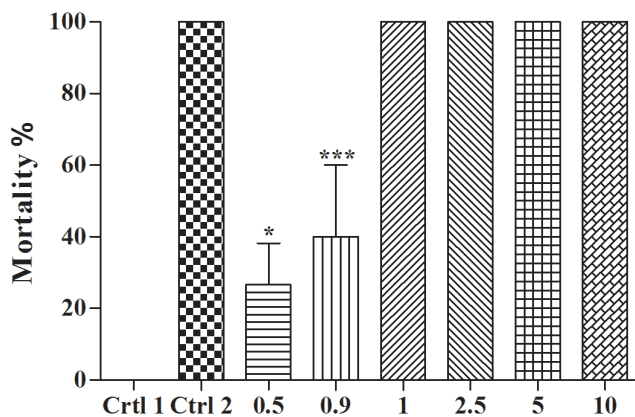

**Figure 5. Toxicity of potassium usnate to *B. glabrata* adults.** Mortality *B. glabrata* subjected to 24 h of treatment with usnate potassium at 0.5; 0.9; 1; 2.5; 5 and 10 µg/ml and control groups (Ctrl 1 dechlorinated water; Ctrl 2–cupric carbonate). \*\*\* $p < 0.0001$  compared to Ctrl 1 (negative control) group. doi:10.1371/journal.pone.0111102.g005

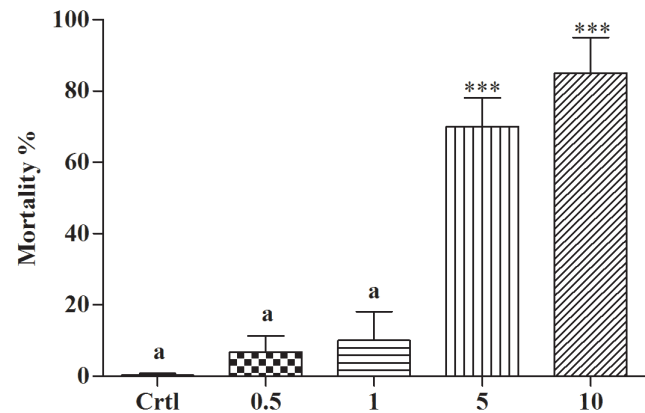

**Figure 6. Toxicity of potassium usnate to *A. salina*.** Mortality of *A. salina* subjected to 24 h of treatment with potassium usnate at 0.5; 1; 5; 10 µg/ml. \*\*\* $p < 0.0001$  for concentrations higher than 5 µg/ml when compared to Ctrl (sea water) group. Letter “a” to indicate that the bars are not significantly different from each other (Tukey's test \*\* $p < 0.05$ ). doi:10.1371/journal.pone.0111102.g006

OH), 13.29 (1H; s, C-8-OH), 18.89 (1H; s, C-3-OH). IR (KBr): 3090, 3007, 2930, 1692, 1632, 1560, 1454, 1370, 1357, 1340, 1330, 1289, 1230, 1190, 1143, 1118, 1070, 1039, 959, 940, 840, 818, 700  $\text{cm}^{-1}$ .

After modification of the usnic acid to form the potassium salt, the sample was analyzed by infrared spectroscopy (IR) and the following data were obtained: (KBr): 3454, 2982, 2929, 1687, 1631, 1540, 1480, 1460, 1382, 1330, 1291, 1240, 1140, 1188, 1136, 1073, 1038, 980, 940, 880, 840, 820, 770, 730, 700  $\text{cm}^{-1}$ .

### Toxicity of potassium usnate to *B. glabrata* embryos, adult snails and *A. salina*

The embryos in the blastula stage of development were treated with potassium usnate at 2.5, 5 and 10 µg/ml and the solutions were lethal at all concentrations tested when compared to control groups ( $p < 0.0001$ ,  $F = 42.46$ ). The mortality rate was 100% at 10 µg/ml (Figure 3). The treatments were significant between the groups: Ctrl vs 5 µg/ml (95% CI of diff –77.61 to –18.39 \*\* $p < 0.005$ ), Ctrl vs 10 µg/ml (95% CI of diff –129.3 to –70.05 \*\*\* $p < 0.0001$ ), 2.5 vs 10 µg/ml (95% CI of diff –105.3 to –46.05 \*\*\* $p < 0.0001$ ) and 5 vs 10 µg/ml (95% CI of diff –81.28 to –22.05 \*\* $p < 0.05$ ) (Figure 4).

Adult snails were more sensitive to the treatments than embryos (\*\* $p < 0.0001$ ,  $F = 78.25$ ). At 0.5 µg/ml (95% CI of diff –49.75 to –3.582 \* $p < 0.05$ ) and 0.9 µg/ml (95% CI of diff –63.08 to –16.92 \*\*\* $p < 0.0001$ ), mean mortality was less than 100%, but significantly different from the negative control (Ctrl 1) (\*\* $p < 0.05$ ). The mortality rate was 100% at 1 to 10 µg/ml (Figure 5).

The LC<sub>50</sub> was 5.77 µg/ml and 0.92 µg/ml for adults and embryos, respectively. In the negative control, no mortality occurred for either embryos or adults, whereas 100% mortality occurred for adult snails treated with cupric carbonate (positive control - Ctrl 2). These results demonstrate the effectiveness of potassium usnate for both embryos and adults of *B. glabrata*. The results of the toxicity on environmental indicator show that potassium usnate was not toxic to *A. salina* at a concentration of 1 µg/ml (95% CI of diff –25.33 to –5.828), but significant results were found at concentrations above 5 µg/ml (95% CI of diff –85.33 to –54.17) and 10 µg/ml (95% CI of diff –100.3 to –69.17) (\*\* $p < 0.0001$ ) when compared to control group (Figure 6). The LC<sub>50</sub> for *A. salina* was 2.6 µg/ml.

## Discussion

The mortality rate of *B. glabrata* embryos and adults treated with potassium usnate was higher than that reported for plant extracts. Saponins derived from *Phytolacca icosandra* and *Cartunare gam milotica* are reported to be active at concentrations of 200 to 25 µg/ml and 26 to 3 µg/ml, respectively [28]. The ethanol extract of the latex from *Euphorbia conspicua* (Euphorbiaceae) at a concentration of 4.87 µg/ml is reported to kill 90% of adults within 96 h; the ethanol extract from the leaves of *Solanum jabrense* (Solanaceae) at a concentration of 39.8 µg/ml is reported to kill 90% within at 24 h [29]; and lectins obtained from *Dioclea guianensis* achieve 100% mortality at 10 µg ml<sup>-1</sup> [5]. However, the whole plant extract of *Agave filifera*, which is rich in flavonoids and steroids [30], is inactive to embryos, likely due to the high molecular weight of their components, which prevents penetration into the gelatinous embryo membrane [31].

A number of studies in the literature report the biological activity of usnic acid isolated from lichens, but few studies have investigated usnate. A line of research has been focused on the antimicrobial activity of sodium usnate against methicillin-resistant *Staphylococcus aureus* [32], whereas no previous reports are found on the molluscicidal activity of potassium usnate. Some studies describe insecticidal and anti-herbivore activities, with records of a deterrent role against herbivores as the most likely ecological function of lichen substances [33,18]. While lichens do not produce these substances with exclusive deterrent activity against herbivore attacks, some animals, such as the slug *Pallifera varia* (Hubricht.), avoid feeding on lichen species, such as *Xanthoparmelia cumberlandia* (Gyelnik) Hale, which contains usnic, norstictic and stictic acids, and *Huilia albocaerulescens* (Wulfen) Hertel, which produces constictic and stictic acids [34].

Different authors have described the preferences of terrestrial snails that feed on certain thallus parts of lichen and report that invertebrates prefer parts that are free of secondary metabolites [35,36,37,38]. The action mechanisms of lichen substances on snails are not well understood, but the poor palatability and direct toxicity to the intestinal microbiota of invertebrates are likely involved [35,39]. The studies cited are in agreement with Bustinza [40], who offered pioneering descriptions of the antimicrobial activity of usnic acid. With the observed preference of terrestrial mollusks, it has been hypothesized that the action of the modified molecule in salt form, which is completely water soluble, could have the same toxic effect on aquatic mollusks, as confirmed by the present results.

It is estimated that more than 7000 chemicals have been tested for mollusk control, such as copper sulfate, gramoxone, calcium hydroxide, N-tritylmorpholin (Frescon) and niclosamide [6]. Niclosamide is the agent recommended by the World Health Organization [7] and is highly efficient in all stages of the mollusk lifecycle, killing 100% of adults and embryos at a concentration of less than 1.5 µg/ml after 2 h of exposure [8]. However, its high

cost, sensitivity to sunlight and high degree of toxicity to fish, amphibians and aquatic plants [9] has limited its use, especially in developing countries, which often have serious basic sanitation problems [10]. This demonstrates the importance of investigating novel substances of a natural origin that may have the same potential as synthetic products.

The potassium usnate seems to be as effective against mollusk as niclosamide, since 100% of mortality was observed at 1 µg/ml. Therefore, due the high cost and toxic effects of niclosamide on the environment as well as the possible buildup of resistance among snails to this compound have become a constant concern to public health authorities [8]. This underscores the importance of the present findings with regard to combating schistosomiasis.

The *A. salina* test was performed to determine the environmental toxicity of potassium usnate. This microcrustacean is highly sensitive to a number of substances, which favors its use as an experimental model for the evaluation of the toxicity of organic residues that might pose risks to the environment and mammals in general [6]. The assays demonstrated that potassium usnate was non-toxic at the molluscicidal concentration, indicating that usnate offers an extremely low risk to aquatic organisms. These results are in agreement to those reported by Lima et al. [9] on potassium salt (lapachol), which was also found to be non-toxic to brine shrimp.

An extract or active component of a plant molluscicide is only considered effective when achieving 90% mortality at 20 µg/ml for the active ingredient and 100 µg/ml for the extract [4]. The present findings demonstrate that potassium salt from usnic acid has increased water solubility (100%), does not lose its biological activity and may be an alternative drug and prototype for a new class of compounds with molluscicidal activity for the control of *B. glabrata* while exhibiting low toxicity to *A. salina*.

These findings are of considerable importance to countries in which the prevalence of schistosomiasis is high and synthetic chemicals are used to eradicate snails, which are costly and cause serious environmental problems, including the development of other types of diseases in mammals due to their high degree of toxicity. Brazil has a rich lichen flora, particularly in endemic regions for *Schistosoma mansoni*. Thus, further investigation into lichen substances is merited.

## Acknowledgments

The authors are grateful to the Brazilian fostering agencies Conselho Nacional de Pesquisa (CNPq), Fundação de Amparo à Ciência do Estado de Pernambuco (FACEPE) and Coordenação de Aperfeiçoamento de Pessoal de Nível Superior (CAPES).

## Author Contributions

Conceived and designed the experiments: MCBM VLML ECP NHS. Performed the experiments: MCBM MCS LRSS. Analyzed the data: MCBM ECP EPSF NHS. Contributed reagents/materials/analysis tools: AMMAM ECP NHS. Wrote the paper: MCBM ECP EPSF NHS.

## References

1. Brasil. Ministério da Saúde (2010) Guia de Vigilância Epidemiológica. 7ª ed. Brasília. Cad 10: 19–29.
2. Brasil. Programa de Vigilância e Controle da Esquistossomose (2011) Coordenação Geral de Doenças Negligenciadas. Situação Epidemiológica de *Esquistossomose mansoni* no Brasil. SUS. Governo Federal.
3. Reis DC, Kloos H, King C, Quites HFO, Matoso LF, et al. (2010) Accessibility to and utilization of schistosomiasis related health services in a rural area of state of Minas Gerais Brazil. Mem Inst Oswaldo Cruz 105: 587–597.
4. World Health Organization (1993) The control of schistosomiasis. WHO Technical Report Series 830 Geneva.
5. Santos AF, Cavada BS, Rocha BAM, Nascimento KS, Sant'Ana AEG (2010) Toxicity of some glucose/manose-binding lectins to *Biomphalaria glabrata* and *Artemia salina*. BioresourTechnol 101: 794–798.
6. Cantanhede SPD, Marques AM, Silva-Souza N, Valverde AL (2010) Atividade molluscicida de plantas: uma alternativa profilática. Braz J Pharmacogn 20: 282–288.
7. Oliveira-Filho EC, Geraldino BR, Coelho DR, De-Carvalho RR, Paumgertten FJR (2010) Comparative toxicity of *Euphorbia milii* látex and synthetic molluscicides to *Biomphalaria glabrata* embryos. Chemosphere 81: 218–227.
8. Ribeiro KAL, Carvalho CM, Molina MT, Lima EP, Lópes-Monteiro E, et al. (2009) Activities of naphthoquinones against *Aedes aegypti* (Linnaeus, 1762) (Diptera: Culicidae), vector of dengue and *Biomphalaria glabrata* (Say, 1818), intermediate host *Schistosoma mansoni*. Acta Trop 111: 44–50.
9. Lima NMF, Santos AF, Porfirio Z, Goulart MOF, Sant'Ana AEG (2002) Toxicity of lapachol and isolapachol and their potassium salts against

- Biomphalaria glabrata*, *Schistosoma mansoni* carcarie, *Artemia salina* and *Tilapia nilotica*. Acta Trop 83: 43–47.
10. Giovanelli A, Vieira MV, Coelho da Silva CLPA (2002) Interaction between the intermediate host of schistosomiasis in Brazil *Biomphalaria glabrata* (Planorbidae) and a possible competitor *Melanoides tuberculata* (Thiaridae): I. Laboratory experiments. Mem Inst Oswaldo Cruz 90: 261–269.
  11. Schall VT, Vasconcellos MC, Rocha SR, Souza CP, Mendes NM (2001) The control of the schistosome-transmitting snail *Biomphalaria glabrata* by the plant molluscicide *Euphorbia splendens* var. *hislopii* (synmilli Des. Moul): a longitudinal field study in an endemic area in Brazil. Acta Trop 79: 165–170.
  12. Luna JS, Santos AF, Lima MRF, Omena MC, Mendonça FAC, et al. (2005) A study of the larvicidal and molluscicidal activities of some medicinal plants from northeast Brazil. J Ethnopharmacol 97: 199–206.
  13. Martins MCB, Lima MJG, Silva FP, Azevedo-Ximenes E, Silva NH, et al. (2010) *Cladia aggregata* (lichen) from Brazilian Northeast: chemical characterization and antimicrobial Activity. Braz Arch Biol Technol 53: 115–122.
  14. Wei X, Jeon HS, Han KS, Koh YJ, H JS (2008) Antifungal Activity of Lichen-forming Fungi against *Colletotrichum acutatum* on hot pepper. Plant Pathol J 24: 202–206.
  15. Campanella L, Delfini M, Ercole A, Iacoangeli E, Risuleo G (2002) Molecular characterization and action of usnic acid a drug that inhibits proliferation of mouse polyomavirus *in vitro* and whose main target is RNA transcription. Biochim 84: 329–334.
  16. Einarsdóttir E, Groeneweg J, Björnsdóttir G, Hardardóttir G, Omarsdóttir S, et al. (2010) Cellular mechanisms of the anticancer effects of the lichen compound usnic acid. Planta Med 76: 969–974.
  17. Nimis PL, Skert N (2006) Lichen chemistry and selective grazing by the coleopteran *Lasioderma serricornis*. Environ Exp Bot 55: 175–182.
  18. Solhaug KA, Lind M, Nybakken L, Gauslaa Y (2009) Possible functional roles of cortical depsides and medullary depsidones in the foliose lichen *Hypogymnia physodes*. Flora 204: 40–48.
  19. Howell GME, Newton EM, Williams-Wynn DD (2003) Molecular structural studies of lichen substances II: atranorin, gyrophoric acid, fumarprotocetraric acid, rhizocarpic acid, calycin, pulvinic dilactone and usnic acid. J Mol Struct 651: 27–57.
  20. Ingólfssdóttir K (2002) Molecules of interest usnic acid. Phytochemistry 61: 729–736.
  21. Stanković M, Stanković S, Dordević Z, Dordević S (1989) Process for obtaining sodium salt of (+)-usnic acid. Pat. Yu. 43978.
  22. Savić I, Nikolić G, Savić I, Zlatković S, Djokić D (2010) New, simple and validated uv-spectrophotometric methods for the estimation of sodium usnate in preparations. Maced J Chem En 29: 157–164.
  23. Asahina Y, Shibata S (1954) Chemistry of lichen substances, first ed. Japan Society for the Promotion of Science, Tokyo.
  24. Odabasoglu F, Cakir A, Suleyman H, Aslan A, Bayir Y, et al. (2006) Gastroprotective and antioxidant effects of usnic acid on indomethacin-induced gastric ulcer in rats. J Ethnopharmacol 103: 59–65.
  25. Legaz ME, Vicente C (1983) Endogenous inactivators of arginase, arginine decarboxylase and agmatine amidinohydrolase in *Evernia prunastri* thallus. Plant Physiol Lancaster 71: 300–301
  26. World Health Organization (1965) WHO Expert Committee on Bilharziasis. Geneva, Tech Rep Ser 299: 1–56.
  27. Huneck S, Yoshimura I (1996) Identification of lichen substances, first ed. Springer, Verlag, Berlin.
  28. Treyvaud V, Marston A, Dyatmiko W, Hostettmann K (2000) Molluscicidal saponins from *Phytolacca icosandra*. Phytochemistry 55, 603–609.
  29. Santos MS, Azevedo DPL, Mata RCS, Mendonça DIMD, Sant'Ana AEG (2007) The lethality of *Euphorbia conspicua* to adults of *Biomphalaria glabrata*, cercaria of *Schistosoma mansoni* and larvae of *Artemia salina*. Bioresour Technol 98: 135–139.
  30. Rawi SM, Al-Hazmi M, Seif Al Nassr F (2011) Comparative study of the molluscicidal activity of some plants extracts on the snail vector *Schistosoma mansoni*, *Biomphalaria alexandrina*. Int J Zool Res 7: 169–189.
  31. Lemma A, Yau P (1974) Studies on the molluscicidal properties of endod (*Phytolacca dodecandra*), III. Ethiopian Med J 12: 109–114.
  32. Elo H, Matikainen J, Peltari E (2007) Potent activity of the lichen antibiotic (+)-usnic acid against clinical isolates of vancomycin-resistant enterococci and methicillin-resistant *Staphylococcus aureus*. Naturwissenschaften 94: 465–468.
  33. Asplund J, Solhaug KA, Gauslaa Y (2009) Fungal depsidones – an inducible or constitutive defense against herbivores in the lichen *Lobaria pulmonaria*? Basic Appl Ecol 10: 273–278.
  34. Lawrey JD (1980). Correlations between lichen secondary chemistry and grazing activity by *Pallifera varia*. Bryologist 23: 128–134.
  35. Benesperi R, Tretiach M (2004) Differential land snail damage to selected species of the lichen genus *Peltigera*. Biochem Sys Ecol 32: 127–138.
  36. Gauslaa Y (2005) Lichen palatability depends on investments in herbivore defense. Oecologia 143: 94–105.
  37. Pöykkö H, Hyvärinen M, Backor M (2005) Removal of lichen secondary metabolites affects food choice and survival of lichenivorous moth larvae. Ecology 86: 2623–2632.
  38. Pöykkö H, Backor M, Bencúrová E, Molcanová V, Backorová M, et al. (2010) Host use of a specialist lichen-feeder: dealing with lichen secondary metabolites Oecologia 164: 423–430.
  39. Lawrey JD (1989) Lichen secondary compounds: evidence for a correspondence between antiherbivore and antimicrobial function. Bryologist 92: 326–328.
  40. Bustinza F (1951) Antibacterial substances from lichens. Endeavour 10: 95–99. 1951.
